# Supplementary material
Source: MDPI journal article supplement (https://www.mdpi.com/2673-1924/4/2/12)
Supplement: s1 [file s1]

Supplementary material

# Seasonal Upwelling Conditions Modulate the Calcification Response of a Tropical Scleractinian Coral

Carlos E. Gómez <sup>1,\*†</sup>, Andrés Acosta-Chaparro <sup>1</sup>, Cesar A. Bernal <sup>2,3</sup>, Diana I. Gómez-López <sup>1</sup>, Raúl Navas-Camacho <sup>1</sup> and David Alonso <sup>1</sup>

<sup>1</sup> Programa de Biodiversidad y Ecosistemas Costeros-BEM, Instituto de Investigaciones Marinas y Costeras—INVEMAR, Santa Marta 470006, Colombia

<sup>2</sup> Programa de Calidad Ambiental Marina-CAM, Instituto de Investigaciones Marinas y Costeras—INVEMAR, Santa Marta 470006, Colombia

<sup>3</sup> Red de Investigación de Estresores Marinos—Costeros en Latinoamérica y el Caribe—REMARCO

\* Correspondence: cegom.s@gmail.com

† Current address: Laboratorio de Biología Molecular Marina-BIOMMAR, Universidad de los Andes, Bogotá 111711, Colombia.

## Figures

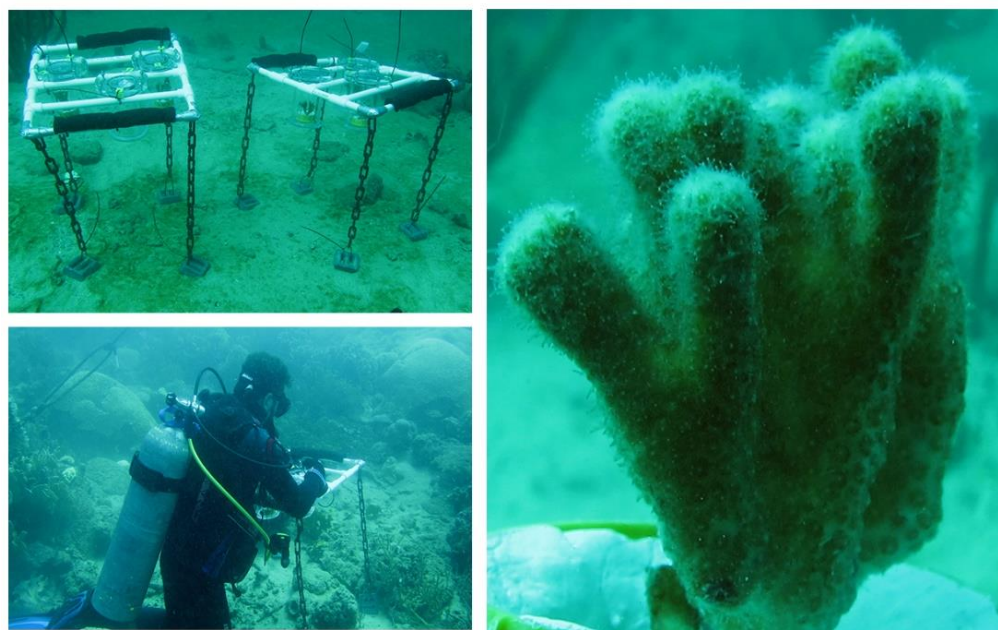

**Figure S1.** Experimental design in Chengue bay. A) incubation chambers within the pendant table-type design, B) fragment close-up showing the natural appearance of the extend polyps during incubation trials, and C) deployment of the chamber by divers.

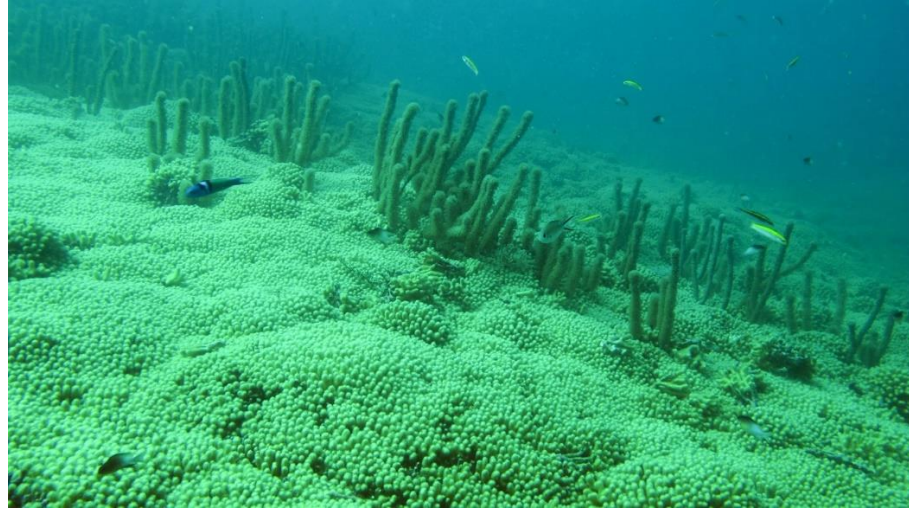

**Figure S2.** Coral reef in Chengue bay where the main growth of *M. auretenra* were found.

## Tables

**Table S1.** Raw data for each of the incubation fragments (replicates). Temperature (Temp) in celcius, salinity (Sal) in practical salinity units (PSU), chamber volume (net), fragment volume, depth (meters) and incubation time (minutes).

| Date       | Fragment | Temp (°C) | Sal (PSU) | Chamber vol. (ml) | Fragment vol. (cm <sup>3</sup> ) | Depth (m) | Incubation time (min) |
|------------|----------|-----------|-----------|-------------------|----------------------------------|-----------|-----------------------|
| 12.02.2020 | C-1      | 28.68     | 33.0      | 880               | 0                                | 12.6      | 145                   |
| 12.02.2020 | MA-1     | 28.84     | 33.4      | 802               | 28                               | 12.6      | 149                   |
| 12.02.2020 | MA-2     | 29.49     | 33.4      | 800               | 30                               | 12.6      | 169                   |
| 12.02.2020 | MA-3     | 29.27     | 33.3      | 800               | 30                               | 12.6      | 162                   |
| 12.02.2020 | MA-4     | 29.02     | 33.3      | 790               | 35                               | 12.6      | 155                   |
| 12.02.2020 | MA-5     | 28.52     | 33.6      | 810               | 25                               | 12.6      | 129                   |
| 12.03.2020 | MA-6     | 28.91     | 33.4      | 785               | 45                               | 13.3      | 152                   |
| 12.03.2020 | MA-7     | 28.94     | 33.5      | 790               | 40                               | 13.3      | 154                   |
| 12.03.2020 | MA-8     | 28.82     | 33.4      | 800               | 30                               | 13.3      | 130                   |
| 12.03.2020 | MA-9     | 29.11     | 33.2      | 800               | 30                               | 13.3      | 159                   |
| 12.03.2020 | C-2      | 28.78     | 33.5      | 870               | 0                                | 13.3      | 122                   |
| 12.03.2020 | MA-10    | 28.68     | 33.5      | 795               | 40                               | 13.3      | 120                   |
| 02.17.2021 | C-3      | 26.63     | 36.0      | 830               | 0                                | 12        | 145                   |
| 02.17.2021 | MA-11    | 26.63     | 35.7      | 783               | 47                               | 12        | 138                   |
| 02.17.2021 | MA-12    | 26.64     | 35.9      | 790               | 40                               | 12        | 155                   |
| 02.17.2021 | MA-13    | 26.63     | 35.8      | 783               | 47                               | 12        | 169                   |
| 02.17.2021 | MA-14    | 26.63     | 35.8      | 785               | 40                               | 12        | 159                   |
| 02.17.2021 | MA-15    | 26.68     | 36.1      | 803               | 32                               | 12        | 130                   |
| 02.19.2021 | SK-C-1   | 26.01     | 35.8      | 880               | 0                                | 13.5      | 208                   |
| 02.19.2021 | SK-1     | 26.01     | 36.1      | 808               | 22                               | 13.5      | 199                   |
| 02.19.2021 | SK-2     | 26.01     | 36.3      | 820               | 10                               | 13.5      | 202                   |
| 02.19.2021 | SK-3     | 26.01     | 36.1      | 817               | 13                               | 13.5      | 196                   |
| 02.19.2021 | SK-4     | 26.01     | 36.1      | 811               | 14                               | 13.5      | 205                   |
| 02.19.2021 | SK-5     | 24.84     | 36.3      | 825               | 10                               | 13.5      | 192                   |
| 03.17.2021 | MA-16    | 24.84     | 35.0      | 780               | 50                               | 12        | 151                   |
| 03.17.2021 | MA-17    | 24.84     | 35.1      | 788               | 42                               | 12        | 160                   |
| 03.17.2021 | C-3      | 24.84     | 35.7      | 875               | 0                                | 12        | 179                   |
| 03.17.2021 | MA-18    | 24.84     | 35.6      | 790               | 40                               | 12        | 148                   |
| 03.17.2021 | MA-19    | 24.84     | 35.7      | 790               | 35                               | 12        | 167                   |
| 03.17.2021 | MA-20    | 24.56     | 36.0      | 795               | 40                               | 12        | 173                   |
| 03.19.2021 | SK-C-1   | 24.56     | 36.3      | 880               | 0                                | 11        | 222                   |
| 03.19.2021 | SK-2     | 24.56     | 36.3      | 808               | 22                               | 11        | 228                   |
| 03.19.2021 | SK-3     | 24.56     | 36.3      | 820               | 10                               | 11        | 225                   |
| 03.19.2021 | SK-4     | 24.55     | 36.3      | 817               | 13                               | 11        | 222                   |
| 03.19.2021 | SK-5     | 24.56     | 36.3      | 811               | 14                               | 11        | 221                   |
| 03.19.2021 | SK-6     | 26.12     | 36.3      | 825               | 10                               | 11        | 215                   |

|            |       |       |      |     |    |      |     |
|------------|-------|-------|------|-----|----|------|-----|
| 05.14.2021 | MA-21 | 26.12 | 35.9 | 778 | 52 | 13.5 | 192 |
| 05.14.2021 | MA-22 | 26.12 | 35.7 | 781 | 49 | 13.5 | 140 |
| 05.14.2021 | MA-23 | 26.12 | 35.9 | 791 | 39 | 13.5 | 152 |
| 05.14.2021 | C-4   | 26.12 | 36.4 | 870 | 0  | 13.5 | 157 |
| 05.14.2021 | MA-24 | 26.12 | 36.1 | 780 | 45 | 13.5 | 162 |
| 05.14.2021 | MA-25 | 26.12 | 36.0 | 798 | 37 | 13.5 | 145 |

**Table S2.** Raw data for each of the incubation fragments (replicates). Total alkalinity ( $A_T$  -  $\mu\text{mol CaCO}_3 \text{ m}^2 \text{ h}^{-1}$ ) initial (i) and final (f), dissolved inorganic carbon (DIC -  $\mu\text{mol CaCO}_3 \text{ m}^2 \text{ h}^{-1}$ ) initial (i) and final (f), net calcification (G -  $\mu\text{mol CaCO}_3 \text{ m}^2 \text{ h}^{-1}$ ) and net dissolution ( $\mu\text{mol CaCO}_3 \text{ m}^2 \text{ h}^{-1}$ ).

| Date       | Fragment | $A_T$ (i) | $A_T$ (f) | DIC (i) | DIC (f)  | Net calcification (G) | Net dissolution |
|------------|----------|-----------|-----------|---------|----------|-----------------------|-----------------|
| 12.02.2020 | C-1      | 2369.5    | 2370.2    | 2042.05 | 2043.50  | -----                 | -----           |
| 12.02.2020 | MA-1     | 2369.5    | 2302.6    | 2042.05 | 1936.81  | 35.00                 | -----           |
| 12.02.2020 | MA-2     | 2369.5    | 2318.3    | 2042.05 | 1948.02  | 25.76                 | -----           |
| 12.02.2020 | MA-3     | 2369.5    | 2301.7    | 2042.05 | 1928.36  | 26.26                 | -----           |
| 12.02.2020 | MA-4     | 2369.5    | 2266.2    | 2042.05 | 1899.11  | 22.23                 | -----           |
| 12.02.2020 | MA-5     | 2369.5    | 2321.3    | 2042.05 | 1975.06  | 29.23                 | -----           |
| 12.03.2020 | MA-6     | 2364.6    | 2273      | 2051.51 | 1853.77  | 15.44                 | -----           |
| 12.03.2020 | MA-7     | 2364.6    | 2274.6    | 2051.51 | 1850.55  | 26.76                 | -----           |
| 12.03.2020 | MA-8     | 2364.6    | 2342.7    | 2051.51 | 1968.49  | 23.49                 | -----           |
| 12.03.2020 | MA-9     | 2364.6    | 2359      | 2051.51 | 1965.19  | 8.48                  | -----           |
| 12.03.2020 | C-2      | 2364.6    | 2374.9    | 2051.51 | 2050.65  | -----                 | -----           |
| 12.03.2020 | MA-10    | 2364.6    | 2329      | 2051.51 | 1956.73  | 25.57                 | -----           |
| 02.17.2021 | C-3      | 2393.8    | 2384.8    | 2069.42 | 2068.70  | -----                 | -----           |
| 02.17.2021 | MA-11    | 2393.8    | 2284.3    | 2069.42 | 1890.01  | 24.36                 | -----           |
| 02.17.2021 | MA-12    | 2393.8    | 2292.6    | 2069.42 | 1868.26  | 23.54                 | -----           |
| 02.17.2021 | MA-13    | 2393.8    | 2216.3    | 2069.42 | 1822.14  | 34.04                 | -----           |
| 02.17.2021 | MA-14    | 2393.8    | 2303.7    | 2069.42 | 1909.22  | 24.45                 | -----           |
| 02.17.2021 | MA-15    | 2393.8    | 2347.1    | 2069.42 | 1963.44  | 19.51                 | -----           |
| 02.19.2021 | SK-C-1   | 2391.2    | 2390.3    | 2075.15 | 2080.40  | -----                 | -----           |
| 02.19.2021 | SK-1     | 2391.2    | 2373.3    | 2075.15 | 2082.97  | -----                 | 6.98            |
| 02.19.2021 | SK-2     | 2391.2    | 2397      | 2075.15 | 2081.04  | -----                 | -1.75           |
| 02.19.2021 | SK-3     | 2391.2    | 2373      | 2075.15 | 2076.00  | -----                 | 7-12            |
| 02.19.2021 | SK-4     | 2391.2    | 2396.3    | 2075.15 | 2083.58  | -----                 | -2.06           |
| 02.19.2021 | SK-5     | 2391.2    | 2380.4    | 2075.15 | 2080.84  | -----                 | 4.97            |
| 03.17.2021 | MA-16    | 2425.5    | 2231.9    | 2115.74 | 1970.33  | 51.82                 | -----           |
| 03.17.2021 | MA-17    | 2425.5    | 2254.4    | 2115.74 | 1839.07  | 33.11                 | -----           |
| 03.17.2021 | C-3      | 2425.5    | 2426.1    | 2115.74 | 2115.23  | -----                 | -----           |
| 03.17.2021 | MA-18    | 2425.5    | 2181.9    | 2115.74 | 1789.35  | 56.83                 | -----           |
| 03.17.2021 | MA-19    | 2425.5    | 2281.3    | 2115.74 | 1873.88  | 33.71                 | -----           |
| 03.17.2021 | MA-20    | 2425.5    | 2245.1    | 2115.74 | 1887.71  | 33.34                 | -----           |
| 03.19.2021 | SK-C-1   | 2415.7    | 2415.3    | 2143.85 | 2120.78  | -----                 | -----           |
| 03.19.2021 | SK-2     | 2415.7    | 2423.9    | 2143.85 | 2137.925 | -----                 | -20.63          |
| 03.19.2021 | SK-3     | 2415.7    | 2439.5    | 2143.85 | 2151.75  | -----                 | -5.30           |
| 03.19.2021 | SK-4     | 2415.7    | 2467.8    | 2143.85 | 2133.53  | -----                 | -3.41           |
| 03.19.2021 | SK-5     | 2415.7    | 2432.1    | 2143.85 | 2128.83  | -----                 | -7.79           |
| 03.19.2021 | SK-6     | 2415.7    | 2395.8    | 2143.85 | 2148.74  | -----                 | 9.19            |
| 05.14.2021 | MA-21    | 2414.2    | 2223.1    | 2094.70 | 1834.73  | 34.80                 | -----           |
| 05.14.2021 | MA-22    | 2414.2    | 2264.8    | 2094.70 | 1918.95  | 39.11                 | -----           |
| 05.14.2021 | MA-23    | 2414.2    | 2307.4    | 2094.70 | 1965.78  | 36.01                 | -----           |
| 05.14.2021 | C-4      | 2414.2    | 2419.6    | 2094.70 | 2091.79  | -----                 | -----           |
| 05.14.2021 | MA-24    | 2414.2    | 2326.4    | 2094.70 | 1877.7   | 21.26                 | -----           |
| 05.14.2021 | MA-25    | 2414.2    | 2325.1    | 2094.70 | 1951.32  | 31.26                 | -----           |
